# Supplementary material
Source: MDPI journal article supplement (https://www.mdpi.com/2073-4352/12/11/1681)
Supplement: s1 [file s1]

# Electronic supplementary information

## A New Zero-Dimensional (CsK<sub>2</sub>)BiCl<sub>6</sub> Metal Halide: Boosting

### Emission via B-Site Mn-Doping

Jie Wu, Shuai Zhang, Jun Yan, Bingsuo Zou, and Ruosheng Zeng\*

*School of Physical Science and Technology, MOE Key Laboratory of New Processing Technology for Non-ferrous Metals and Materials, Guangxi Key Laboratory of Processing for Non-ferrous Metals and Featured Materials, Guangxi University, Nanning 530004, China*

\* Corresponding author: zengrsh@guet.edu.cn

#### Experimental method

Mn<sup>2+</sup>:(CsK<sub>2</sub>)BiCl<sub>6</sub> metal halides were synthesized by the solvent method. Taking 10%Mn<sup>2+</sup> doping concentration as an example, 2 mmol CsCl, 1 mmol KCl, 1 mmol BiCl<sub>3</sub>, and 0.1 mmol MnCl<sub>4</sub>·H<sub>2</sub>O and 5 ml HCl were sealed in a 25 ml Teflon liner, then heated at 160 °C for 12 h in a stainless steel autoclave, followed by slow cooling to room temperature. Transfer the reaction mixture from the lining to the centrifuge tube and put it into a high-speed centrifuge. Centrifugation at 5000 RPM for 5 min. After centrifugation, the supernatant was discarded and the sample was centrifuged at 6000 RPM for 3 minutes. Finally, the sample was washed with anhydrous ethanol 3 times and put into a drying oven and dried at 60°C for 24 hours. Different concentrations of Mn<sup>2+</sup> ion doping can be adjusted according to the change of Mn/Bi feeding ratio by chemical formula.

#### Characterizations

The Single-crystal X-ray diffraction (SCXRD) data were collected by Oxford Gemini S ultra-system with graphite monochromated Mo K $\alpha$  radiation ( $\lambda = 0.71073$  Å) at 150 K. Powder X-ray diffraction (PXRD) data were obtained by Bruker diffractometer. The ultraviolet-visible-near infrared (UV-VIS-NIR) spectrophotometer (PerkinElmer Instruments, Lambda 750) was used to measure the absorption spectra.

The elemental composition and chemical state were identified by X-ray photoelectron spectroscopy (XPS, Thermo Fisher Scientific ESCALAB 250Xi). The PL and PLE spectra, PLQY, temperature-dependent PL spectra, and PL decay were measured with a Horiba Jobin Yvon fluorolo3 spectrometer and an Edinburgh FLS 1000 fluorescence spectrometer.

The decomposition pathways and corresponding  $\Delta H_d$  (unit: meV/atom) are as follows:

***(Cs<sub>2</sub>K)BiCl<sub>6</sub>:***

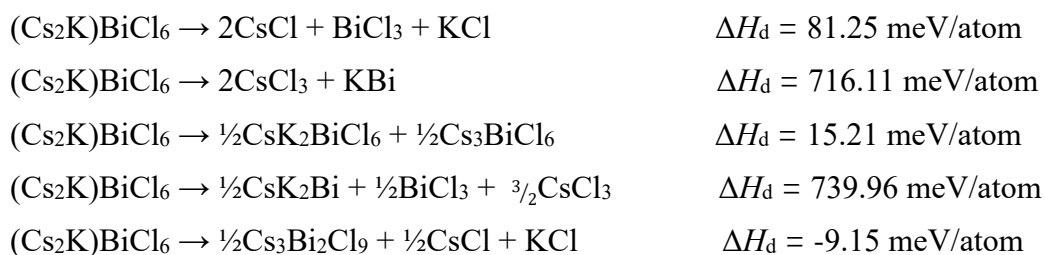

***K<sub>3</sub>BiCl<sub>6</sub>:***

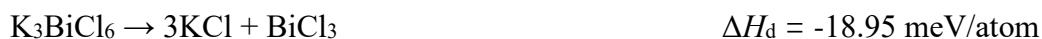

***Cs<sub>3</sub>BiCl<sub>6</sub>:***

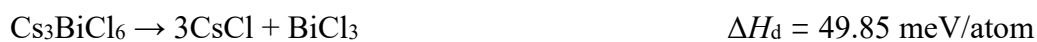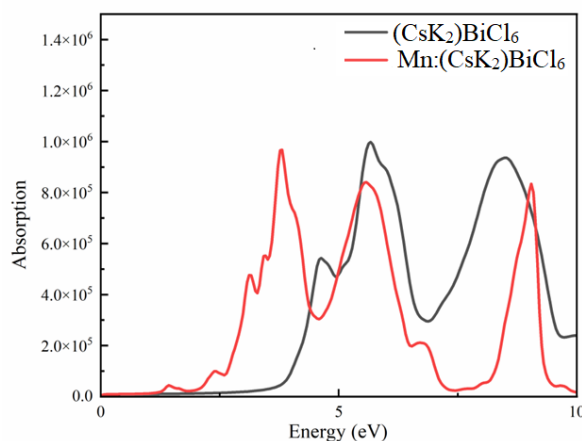

**Figure S1.** Absorption coefficients of Mn-doped and undoped  $(\text{CsK}_2)\text{BiCl}_6$

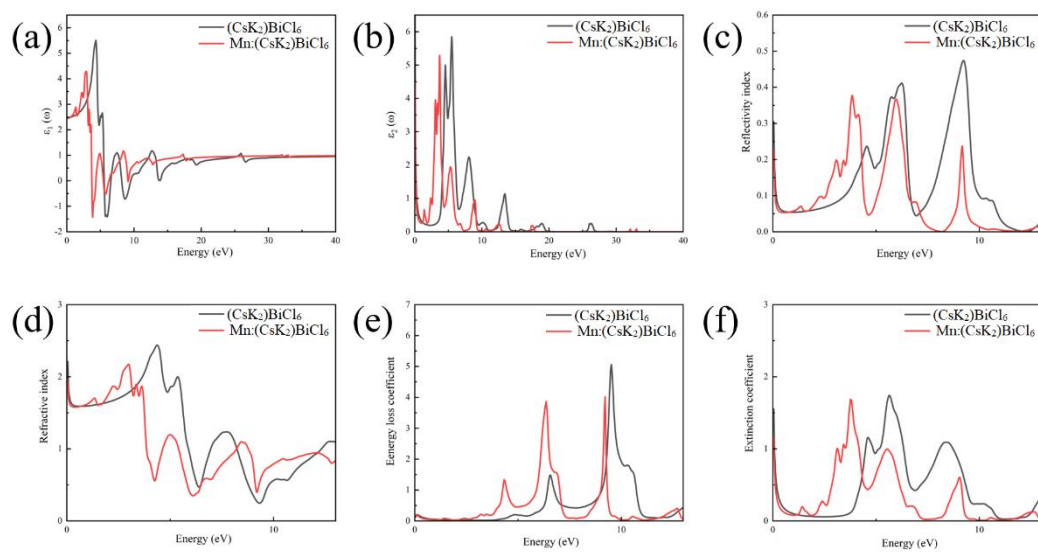

**Figure S2.** (a-f) Real and imaginary parts of the dielectric function, reflectivity index, refractive index, energy loss coefficient, extinction coefficient of pristine  $(\text{CsK}_2)\text{BiCl}_6$  and Mn-doped  $(\text{CsK}_2)\text{BiCl}_6$

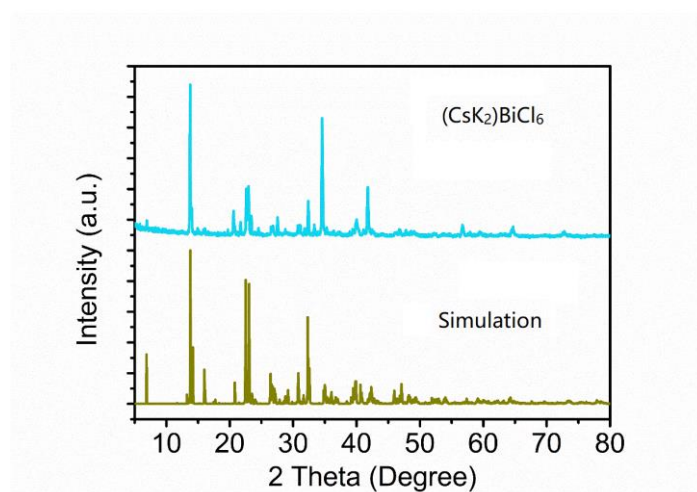

**Figure S3.** Experimental and calculated power XRD pattern of  $(\text{CsK}_2)\text{BiCl}_6$ .

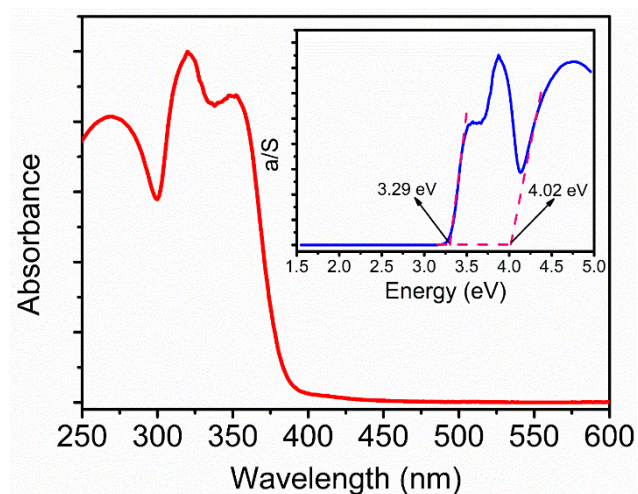

**Figure S4.** The absorption spectra of  $(\text{CsK}_2)\text{BiCl}_6$  and corresponding Tauc spectra.

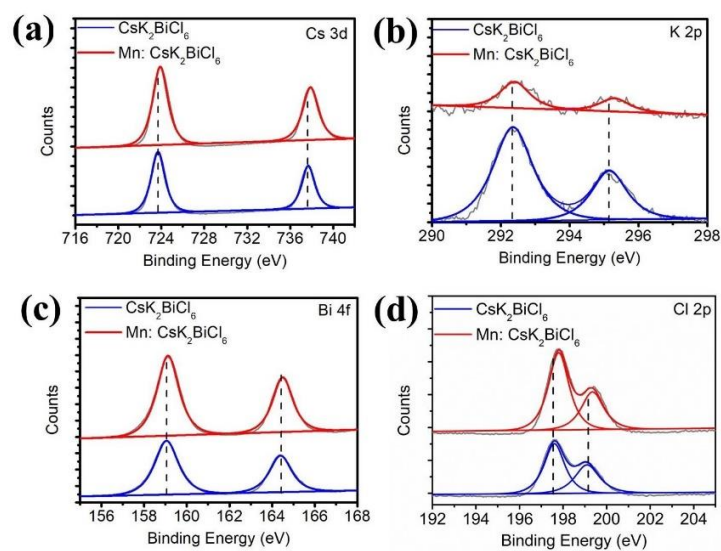

**Figure S5.** the high-resolution XPS spectra of Cs, K, Bi and Cl in the 10%Mn:  $(\text{CsK}_2)\text{BiCl}_6$

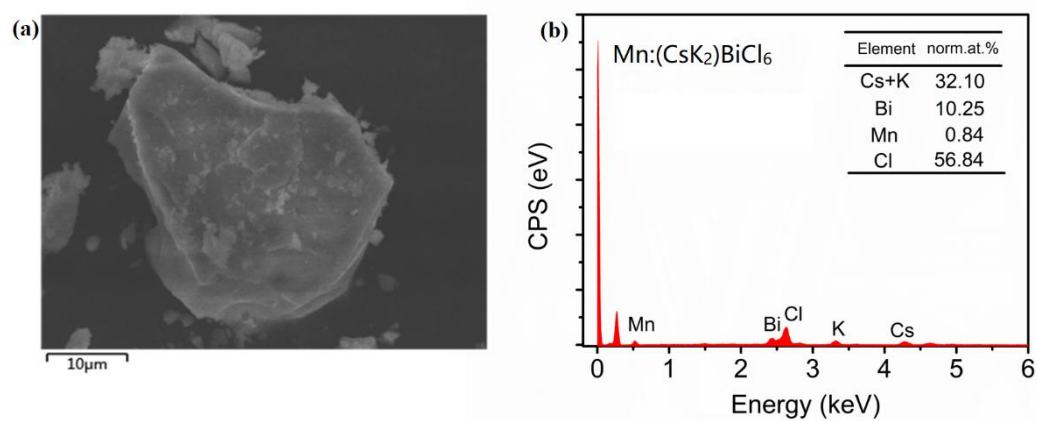

**Figure S6.** (a)The SEM characterization of 10%  $\text{Mn}:(\text{CsK}_2)\text{BiCl}_6$ . (b) the corresponding EDS spectrum.

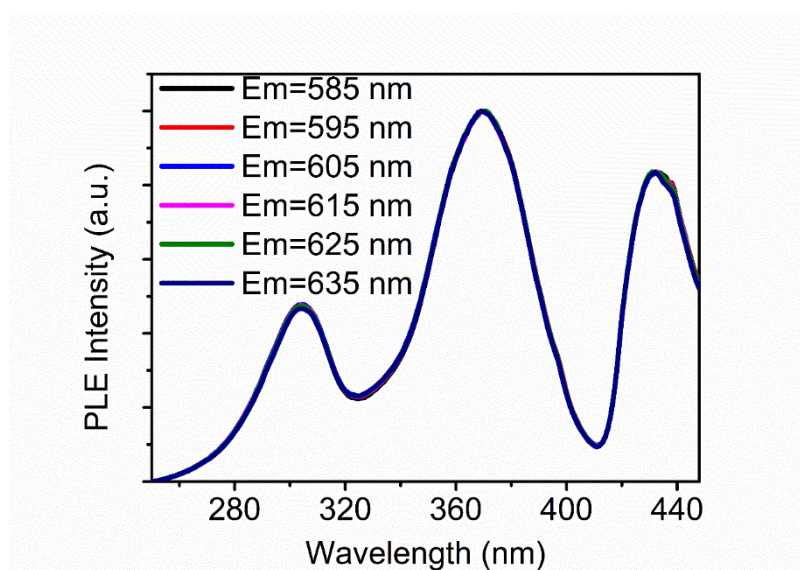

**Figure S7.** The PLE spectra for different PL positions of  $\text{Mn}:(\text{CsK}_2)\text{BiCl}_6$  (Mn/Bi=0.1).

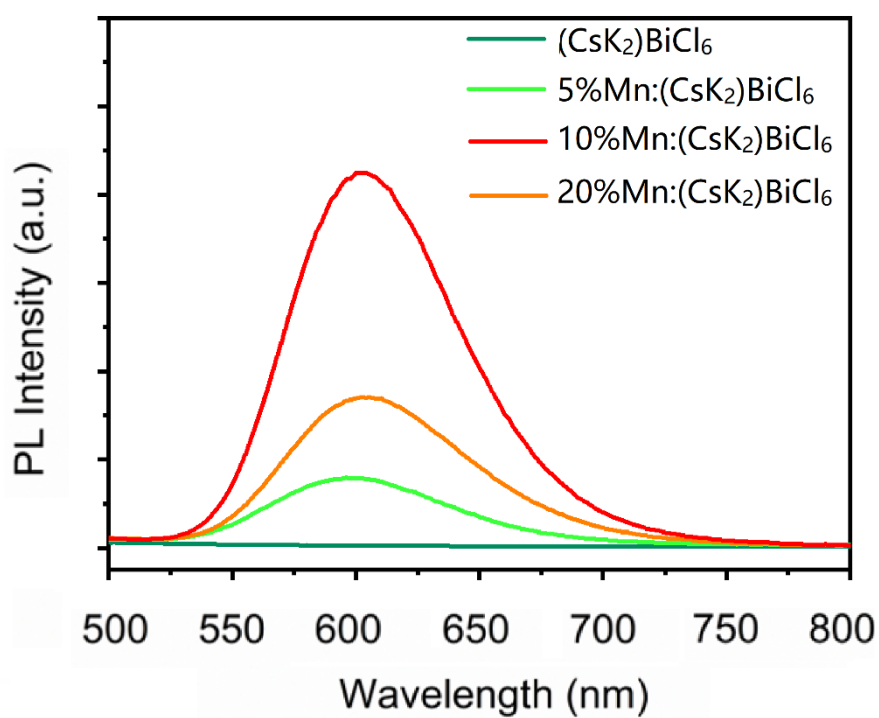

**Figure S8.** The PL spectra of  $\text{Mn}:(\text{CsK}_2)\text{BiCl}_6$  with different  $\text{Mn}^{2+}$  doping concentrations.

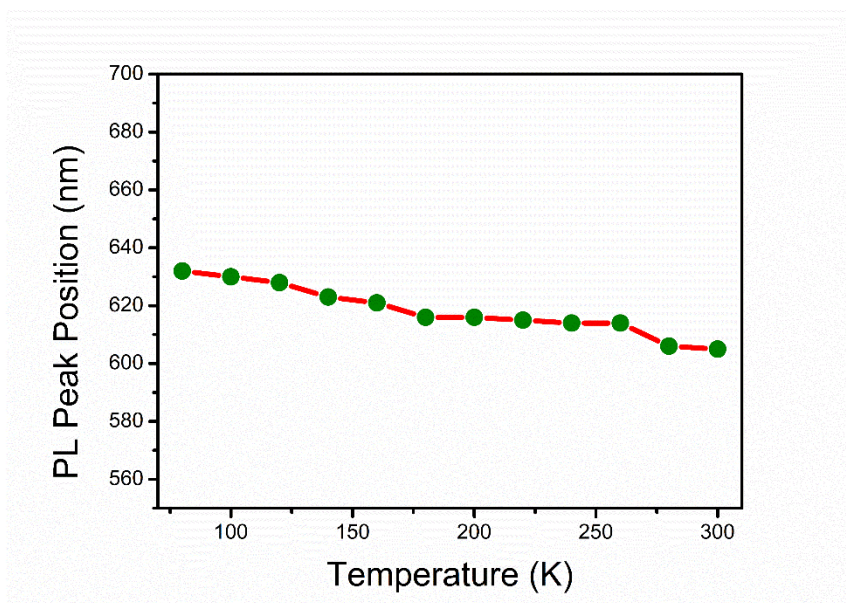

**Figure S9.** Dot plot of PL peak position as a function of temperature.

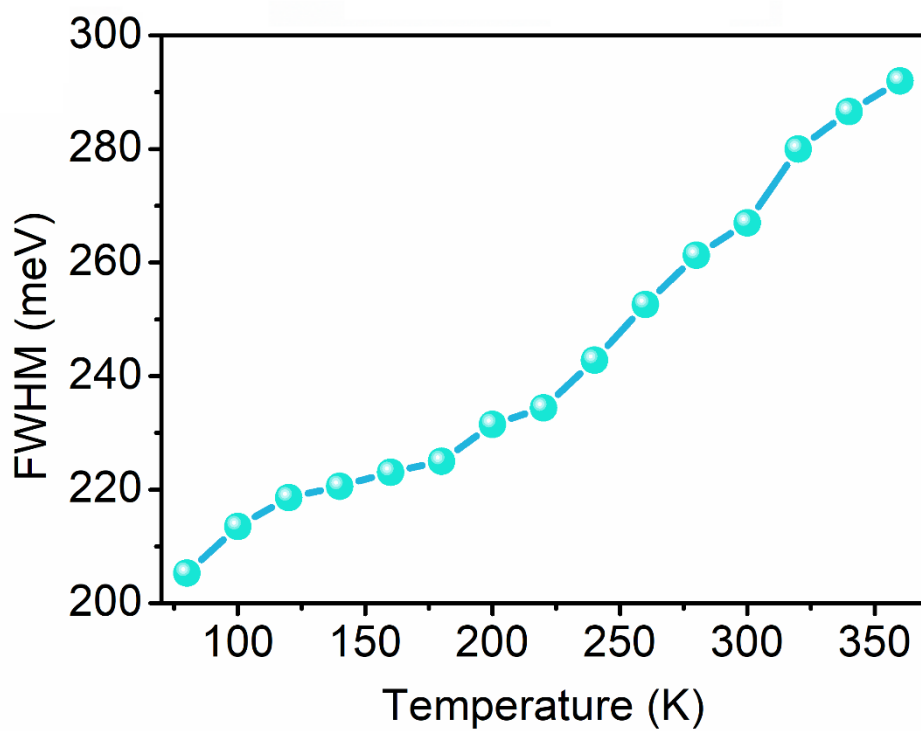

**Figure S10.** The relationship between FWHM and temperature.

**Table S1** The PL lifetime fitting result of  $(\text{CsK}_2)\text{BiCl}_6$  with different Mn concentration.

| Mn concentration | $A_1$  | $\tau_1$ (ms) | $A_2$  | $\tau_2$ (ms) | $\tau_{\text{ave}}$ (ms) |
|------------------|--------|---------------|--------|---------------|--------------------------|
| 5%               | 0.2977 | 0.0612        | 0.9579 | 0.0123        | 0.0419                   |
| 10%              | 0.2671 | 0.0964        | 0.8282 | 0.0198        | 0.0666                   |
| 20%              | 0.1174 | 0.1379        | 0.9293 | 0.0239        | 0.0819                   |
